# Supplementary material
Source: publisher figshare collection journal article supplement (https://acs.figshare.com/ndownloader/files/3745768)
Supplement: Supplementary file 1 [file 3745768]

 
data_ty0916 
 
_audit_creation_method            SHELXL-97 
_chemical_name_systematic 
; 
 ? 
; 
_chemical_name_common             ? 
_chemical_melting_point           ? 
_chemical_formula_moiety          'C23 H25 N S2' 
_chemical_formula_sum 
 'C23 H25 N S2' 
_chemical_formula_weight          379.56 
 
loop_ 
 _atom_type_symbol 
 _atom_type_description 
 _atom_type_scat_dispersion_real 
 _atom_type_scat_dispersion_imag 
 _atom_type_scat_source 
 'C'  'C'   0.0033   0.0016 
 'International Tables Vol C Tables 4.2.6.8 and 6.1.1.4' 
 'H'  'H'   0.0000   0.0000 
 'International Tables Vol C Tables 4.2.6.8 and 6.1.1.4' 
 'N'  'N'   0.0061   0.0033 
 'International Tables Vol C Tables 4.2.6.8 and 6.1.1.4' 
 'S'  'S'   0.1246   0.1234 
 'International Tables Vol C Tables 4.2.6.8 and 6.1.1.4' 
 
_symmetry_cell_setting            monoclinic 
_symmetry_space_group_name_H-M    P21/c 
 
loop_ 
 _symmetry_equiv_pos_as_xyz 
 'x, y, z' 
 '-x, y+1/2, -z+1/2' 
 '-x, -y, -z' 
 'x, -y-1/2, z-1/2' 
 
_cell_length_a                    7.4977(14) 
_cell_length_b                    11.606(2) 
_cell_length_c                    23.037(5) 
_cell_angle_alpha                 90.00 
_cell_angle_beta                  91.639(3) 
_cell_angle_gamma                 90.00 
_cell_volume                      2003.7(7) 
_cell_formula_units_Z             4 
_cell_measurement_temperature     293(2) 
_cell_measurement_reflns_used     ? 
_cell_measurement_theta_min       ? 
_cell_measurement_theta_max       ? 
 
_exptl_crystal_description        platelet 
_exptl_crystal_colour             colourless 
_exptl_crystal_size_max           0.31 
_exptl_crystal_size_mid           0.09 
_exptl_crystal_size_min           0.03 
_exptl_crystal_density_meas       ? 
_exptl_crystal_density_diffrn     1.258 
_exptl_crystal_density_method     'not measured' 
_exptl_crystal_F_000              808 
_exptl_absorpt_coefficient_mu     0.272 
_exptl_absorpt_correction_type    integration 
_exptl_absorpt_correction_T_min   0.9204 
_exptl_absorpt_correction_T_max   0.9919 
_exptl_absorpt_process_details    '(Higashi, 1999)' 
 
_exptl_special_details 
; 
 ? 
; 
 
_diffrn_ambient_temperature       293(2) 
_diffrn_radiation_wavelength      0.71075 
_diffrn_radiation_type            MoK\a 
_diffrn_radiation_source          'fine-focus sealed tube' 
_diffrn_radiation_monochromator   graphite 
_diffrn_measurement_device_type   'Rigaku/MSC Mercury CCD'
_diffrn_measurement_method             \w
_diffrn_detector_area_resol_mean       14.62
_diffrn_standards_number          ? 
_diffrn_standards_interval_count  ? 
_diffrn_standards_interval_time   ? 
_diffrn_standards_decay_%         ? 
_diffrn_reflns_number             16661 
_diffrn_reflns_av_R_equivalents   0.0702 
_diffrn_reflns_av_sigmaI/netI     0.0892 
_diffrn_reflns_limit_h_min        -7 
_diffrn_reflns_limit_h_max        9 
_diffrn_reflns_limit_k_min        -15 
_diffrn_reflns_limit_k_max        10 
_diffrn_reflns_limit_l_min        -29 
_diffrn_reflns_limit_l_max        28 
_diffrn_reflns_theta_min          1.97 
_diffrn_reflns_theta_max          27.49 
_reflns_number_total              4587 
_reflns_number_gt                 2977 
_reflns_threshold_expression      >2sigma(I) 
 
_computing_data_collection        ? 
_computing_cell_refinement        ? 
_computing_data_reduction         ? 
_computing_structure_solution     'SHELXS-97 (Sheldrick, 1990)' 
_computing_structure_refinement   'SHELXL-97 (Sheldrick, 1997)' 
_computing_molecular_graphics     ? 
_computing_publication_material   ? 
 
_refine_special_details 
; 
 Refinement of F^2^ against ALL reflections.  The weighted R-factor wR and 
 goodness of fit S are based on F^2^, conventional R-factors R are based 
 on F, with F set to zero for negative F^2^. The threshold expression of 
 F^2^ > 2sigma(F^2^) is used only for calculating R-factors(gt) etc. and is 
 not relevant to the choice of reflections for refinement.  R-factors based 
 on F^2^ are statistically about twice as large as those based on F, and R- 
 factors based on ALL data will be even larger. 
; 
 
_refine_ls_structure_factor_coef  Fsqd  
_refine_ls_matrix_type            full 
_refine_ls_weighting_scheme       calc  
_refine_ls_weighting_details 
 'calc w=1/[\s^2^(Fo^2^)+(0.0300P)^2^+13.7500P] where P=(Fo^2^+2Fc^2^)/3' 
_atom_sites_solution_primary      direct 
_atom_sites_solution_secondary    difmap 
_atom_sites_solution_hydrogens    geom 
_refine_ls_hydrogen_treatment     constr 
_refine_ls_extinction_method      none 
_refine_ls_extinction_coef        ? 
_refine_ls_number_reflns          4587 
_refine_ls_number_parameters      239 
_refine_ls_number_restraints      0 
_refine_ls_R_factor_all           0.1112 
_refine_ls_R_factor_gt            0.0648 
_refine_ls_wR_factor_ref          0.1616 
_refine_ls_wR_factor_gt           0.1384 
_refine_ls_goodness_of_fit_ref    1.088 
_refine_ls_restrained_S_all       1.088 
_refine_ls_shift/su_max           0.000 
_refine_ls_shift/su_mean          0.000 
 
loop_ 
 _atom_site_label 
 _atom_site_type_symbol 
 _atom_site_fract_x 
 _atom_site_fract_y 
 _atom_site_fract_z 
 _atom_site_U_iso_or_equiv 
 _atom_site_adp_type 
 _atom_site_occupancy 
 _atom_site_symmetry_multiplicity 
 _atom_site_calc_flag 
 _atom_site_refinement_flags 
 _atom_site_disorder_assembly 
 _atom_site_disorder_group 
S1 S 0.34607(11) 0.41266(6) 0.21311(3) 0.0329(2) Uani 1 1 d . . . 
S2 S 0.34445(11) 0.72965(6) 0.06506(4) 0.0389(2) Uani 1 1 d . . . 
N1 N 0.0114(3) 0.67381(18) 0.09350(11) 0.0297(6) Uani 1 1 d . . . 
C1 C 0.3620(4) 0.3657(2) 0.14254(13) 0.0285(7) Uani 1 1 d . . . 
C2 C 0.3104(4) 0.4507(2) 0.10439(14) 0.0294(7) Uani 1 1 d . . . 
H2 H 0.3142 0.4428 0.0643 0.035 Uiso 1 1 calc R . . 
C3 C 0.2505(4) 0.5524(2) 0.13235(14) 0.0282(7) Uani 1 1 d . . . 
C4 C 0.2617(4) 0.5453(2) 0.19158(14) 0.0287(7) Uani 1 1 d . . . 
C5 C 0.4191(4) 0.2470(2) 0.12943(13) 0.0294(7) Uani 1 1 d . . . 
C6 C 0.3893(4) 0.1563(2) 0.16716(14) 0.0371(8) Uani 1 1 d . . . 
H6 H 0.3390 0.1711 0.2028 0.045 Uiso 1 1 calc R . . 
C7 C 0.4326(5) 0.0455(2) 0.15282(16) 0.0419(9) Uani 1 1 d . . . 
H7 H 0.4100 -0.0140 0.1786 0.050 Uiso 1 1 calc R . . 
C8 C 0.5094(5) 0.0214(2) 0.10051(16) 0.0408(9) Uani 1 1 d . . . 
H8 H 0.5386 -0.0540 0.0910 0.049 Uiso 1 1 calc R . . 
C9 C 0.5423(4) 0.1101(2) 0.06250(15) 0.0377(8) Uani 1 1 d . . . 
H9 H 0.5942 0.0945 0.0272 0.045 Uiso 1 1 calc R . . 
C10 C 0.4984(4) 0.2224(2) 0.07678(14) 0.0347(7) Uani 1 1 d . . . 
H10 H 0.5219 0.2819 0.0511 0.042 Uiso 1 1 calc R . . 
C11 C 0.2073(4) 0.6292(2) 0.23570(13) 0.0286(7) Uani 1 1 d . . . 
C12 C 0.2271(4) 0.7471(2) 0.22727(14) 0.0360(8) Uani 1 1 d . . . 
H12 H 0.2781 0.7745 0.1936 0.043 Uiso 1 1 calc R . . 
C13 C 0.1706(5) 0.8239(3) 0.26933(16) 0.0419(9) Uani 1 1 d . . . 
H13 H 0.1830 0.9027 0.2633 0.050 Uiso 1 1 calc R . . 
C14 C 0.0970(5) 0.7851(3) 0.31950(16) 0.0441(9) Uani 1 1 d . . . 
H14 H 0.0586 0.8374 0.3471 0.053 Uiso 1 1 calc R . . 
C15 C 0.0800(5) 0.6681(3) 0.32888(15) 0.0434(9) Uani 1 1 d . . . 
H15 H 0.0322 0.6410 0.3631 0.052 Uiso 1 1 calc R . . 
C16 C 0.1345(4) 0.5916(2) 0.28707(14) 0.0369(8) Uani 1 1 d . . . 
H16 H 0.1221 0.5129 0.2935 0.044 Uiso 1 1 calc R . . 
C17 C 0.1859(4) 0.6538(2) 0.09711(13) 0.0277(7) Uani 1 1 d . . . 
C18 C -0.1202(4) 0.5958(3) 0.12077(16) 0.0386(8) Uani 1 1 d . . . 
H18 H -0.0516 0.5375 0.1427 0.046 Uiso 1 1 calc R . . 
C19 C -0.2299(5) 0.5320(3) 0.07416(18) 0.0492(10) Uani 1 1 d . . . 
H19 H -0.3047 0.5859 0.0533 0.074 Uiso 1 1 calc R . . 
H19A H -0.3028 0.4750 0.0921 0.074 Uiso 1 1 calc R . . 
H19B H -0.1512 0.4951 0.0478 0.074 Uiso 1 1 calc R . . 
C20 C -0.2355(5) 0.6584(3) 0.16393(16) 0.0517(10) Uani 1 1 d . . . 
H20 H -0.1604 0.6991 0.1914 0.078 Uiso 1 1 calc R . . 
H20A H -0.3069 0.6035 0.1840 0.078 Uiso 1 1 calc R . . 
H20B H -0.3119 0.7121 0.1436 0.078 Uiso 1 1 calc R . . 
C21 C -0.0693(4) 0.7717(2) 0.05924(14) 0.0354(8) Uani 1 1 d . . . 
H21 H -0.1986 0.7650 0.0634 0.043 Uiso 1 1 calc R . . 
C22 C -0.0378(5) 0.7642(3) -0.00557(15) 0.0453(9) Uani 1 1 d . . . 
H22 H 0.0836 0.7845 -0.0129 0.068 Uiso 1 1 calc R . . 
H22A H -0.1167 0.8164 -0.0260 0.068 Uiso 1 1 calc R . . 
H22B H -0.0604 0.6870 -0.0188 0.068 Uiso 1 1 calc R . . 
C23 C -0.0175(5) 0.8885(2) 0.08492(18) 0.0542(11) Uani 1 1 d . . . 
H23 H -0.0386 0.8884 0.1258 0.081 Uiso 1 1 calc R . . 
H23A H -0.0879 0.9477 0.0664 0.081 Uiso 1 1 calc R . . 
H23B H 0.1067 0.9027 0.0788 0.081 Uiso 1 1 calc R . . 
 
loop_ 
 _atom_site_aniso_label 
 _atom_site_aniso_U_11 
 _atom_site_aniso_U_22 
 _atom_site_aniso_U_33 
 _atom_site_aniso_U_23 
 _atom_site_aniso_U_13 
 _atom_site_aniso_U_12 
S1 0.0374(5) 0.0323(4) 0.0290(5) 0.0016(3) 0.0002(3) 0.0054(3) 
S2 0.0299(5) 0.0421(4) 0.0448(6) 0.0124(3) 0.0046(4) -0.0024(3) 
N1 0.0275(15) 0.0299(12) 0.0316(15) 0.0034(10) 0.0009(12) 0.0027(10) 
C1 0.0265(17) 0.0305(14) 0.0284(18) -0.0015(12) 0.0008(13) 0.0008(11) 
C2 0.0248(17) 0.0346(15) 0.0288(18) -0.0012(12) 0.0034(14) -0.0008(12) 
C3 0.0224(17) 0.0293(14) 0.0329(19) 0.0021(11) 0.0031(13) 0.0003(11) 
C4 0.0247(17) 0.0291(14) 0.0324(19) -0.0001(11) 0.0031(14) 0.0013(11) 
C5 0.0270(17) 0.0305(14) 0.0307(18) -0.0004(12) -0.0004(14) 0.0001(11) 
C6 0.039(2) 0.0408(17) 0.032(2) 0.0034(13) 0.0035(16) 0.0007(13) 
C7 0.047(2) 0.0283(15) 0.050(2) 0.0064(14) -0.0035(18) -0.0030(13) 
C8 0.041(2) 0.0293(15) 0.052(2) -0.0051(14) -0.0017(18) 0.0018(13) 
C9 0.043(2) 0.0343(16) 0.036(2) -0.0073(13) 0.0039(16) 0.0013(13) 
C10 0.038(2) 0.0331(15) 0.0330(19) 0.0006(12) 0.0023(15) -0.0018(13) 
C11 0.0270(17) 0.0344(14) 0.0243(17) -0.0011(11) -0.0007(13) 0.0038(12) 
C12 0.041(2) 0.0346(16) 0.0328(19) -0.0011(13) 0.0013(16) -0.0027(13) 
C13 0.044(2) 0.0291(15) 0.052(2) -0.0083(14) 0.0000(18) 0.0033(13) 
C14 0.044(2) 0.0462(19) 0.042(2) -0.0140(15) 0.0031(18) 0.0089(15) 
C15 0.045(2) 0.051(2) 0.034(2) -0.0044(15) 0.0106(17) 0.0045(16) 
C16 0.042(2) 0.0338(15) 0.035(2) 0.0008(13) 0.0034(16) 0.0039(13) 
C17 0.0279(18) 0.0311(14) 0.0240(17) -0.0017(11) 0.0019(13) 0.0009(11) 
C18 0.0233(18) 0.0441(17) 0.048(2) 0.0119(14) 0.0023(16) 0.0005(13) 
C19 0.033(2) 0.0458(19) 0.068(3) -0.0006(17) -0.0051(19) -0.0061(15) 
C20 0.030(2) 0.085(3) 0.041(2) 0.0089(19) 0.0060(18) 0.0024(18) 
C21 0.0296(18) 0.0355(15) 0.041(2) 0.0075(13) -0.0035(15) 0.0074(13) 
C22 0.042(2) 0.0511(19) 0.042(2) 0.0103(15) -0.0120(18) 0.0010(15) 
C23 0.065(3) 0.0347(18) 0.063(3) -0.0042(16) 0.000(2) 0.0135(16) 
 
_geom_special_details 
; 
 All esds (except the esd in the dihedral angle between two l.s. planes) 
 are estimated using the full covariance matrix.  The cell esds are taken 
 into account individually in the estimation of esds in distances, angles 
 and torsion angles; correlations between esds in cell parameters are only 
 used when they are defined by crystal symmetry.  An approximate (isotropic) 
 treatment of cell esds is used for estimating esds involving l.s. planes. 
; 
 
loop_ 
 _geom_bond_atom_site_label_1 
 _geom_bond_atom_site_label_2 
 _geom_bond_distance 
 _geom_bond_site_symmetry_2 
 _geom_bond_publ_flag 
S1 C1 1.722(3) . ? 
S1 C4 1.732(3) . ? 
S2 C17 1.669(3) . ? 
N1 C17 1.329(4) . ? 
N1 C18 1.491(4) . ? 
N1 C21 1.500(3) . ? 
C1 C2 1.370(4) . ? 
C1 C5 1.476(4) . ? 
C2 C3 1.423(4) . ? 
C2 H2 0.9300 . ? 
C3 C4 1.367(4) . ? 
C3 C17 1.502(4) . ? 
C4 C11 1.474(4) . ? 
C5 C6 1.387(4) . ? 
C5 C10 1.395(4) . ? 
C6 C7 1.369(4) . ? 
C6 H6 0.9300 . ? 
C7 C8 1.379(5) . ? 
C7 H7 0.9300 . ? 
C8 C9 1.378(4) . ? 
C8 H8 0.9300 . ? 
C9 C10 1.387(4) . ? 
C9 H9 0.9300 . ? 
C10 H10 0.9300 . ? 
C11 C16 1.388(4) . ? 
C11 C12 1.390(4) . ? 
C12 C13 1.391(4) . ? 
C12 H12 0.9300 . ? 
C13 C14 1.371(5) . ? 
C13 H13 0.9300 . ? 
C14 C15 1.382(4) . ? 
C14 H14 0.9300 . ? 
C15 C16 1.380(4) . ? 
C15 H15 0.9300 . ? 
C16 H16 0.9300 . ? 
C18 C20 1.521(5) . ? 
C18 C19 1.525(5) . ? 
C18 H18 0.9800 . ? 
C19 H19 0.9600 . ? 
C19 H19A 0.9600 . ? 
C19 H19B 0.9600 . ? 
C20 H20 0.9600 . ? 
C20 H20A 0.9600 . ? 
C20 H20B 0.9600 . ? 
C21 C22 1.521(5) . ? 
C21 C23 1.525(4) . ? 
C21 H21 0.9800 . ? 
C22 H22 0.9600 . ? 
C22 H22A 0.9600 . ? 
C22 H22B 0.9600 . ? 
C23 H23 0.9600 . ? 
C23 H23A 0.9600 . ? 
C23 H23B 0.9600 . ? 
 
loop_ 
 _geom_angle_atom_site_label_1 
 _geom_angle_atom_site_label_2 
 _geom_angle_atom_site_label_3 
 _geom_angle 
 _geom_angle_site_symmetry_1 
 _geom_angle_site_symmetry_3 
 _geom_angle_publ_flag 
C1 S1 C4 92.62(14) . . ? 
C17 N1 C18 122.0(2) . . ? 
C17 N1 C21 123.1(2) . . ? 
C18 N1 C21 114.8(2) . . ? 
C2 C1 C5 128.3(3) . . ? 
C2 C1 S1 110.6(2) . . ? 
C5 C1 S1 121.1(2) . . ? 
C1 C2 C3 113.2(3) . . ? 
C1 C2 H2 123.4 . . ? 
C3 C2 H2 123.4 . . ? 
C4 C3 C2 113.0(2) . . ? 
C4 C3 C17 126.6(3) . . ? 
C2 C3 C17 120.4(3) . . ? 
C3 C4 C11 129.7(3) . . ? 
C3 C4 S1 110.5(2) . . ? 
C11 C4 S1 119.7(2) . . ? 
C6 C5 C10 118.0(3) . . ? 
C6 C5 C1 121.8(3) . . ? 
C10 C5 C1 120.1(3) . . ? 
C7 C6 C5 121.2(3) . . ? 
C7 C6 H6 119.4 . . ? 
C5 C6 H6 119.4 . . ? 
C6 C7 C8 120.6(3) . . ? 
C6 C7 H7 119.7 . . ? 
C8 C7 H7 119.7 . . ? 
C9 C8 C7 119.4(3) . . ? 
C9 C8 H8 120.3 . . ? 
C7 C8 H8 120.3 . . ? 
C8 C9 C10 120.2(3) . . ? 
C8 C9 H9 119.9 . . ? 
C10 C9 H9 119.9 . . ? 
C9 C10 C5 120.6(3) . . ? 
C9 C10 H10 119.7 . . ? 
C5 C10 H10 119.7 . . ? 
C16 C11 C12 118.4(3) . . ? 
C16 C11 C4 120.2(3) . . ? 
C12 C11 C4 121.4(3) . . ? 
C11 C12 C13 119.8(3) . . ? 
C11 C12 H12 120.1 . . ? 
C13 C12 H12 120.1 . . ? 
C14 C13 C12 121.0(3) . . ? 
C14 C13 H13 119.5 . . ? 
C12 C13 H13 119.5 . . ? 
C13 C14 C15 119.7(3) . . ? 
C13 C14 H14 120.2 . . ? 
C15 C14 H14 120.2 . . ? 
C16 C15 C14 119.5(3) . . ? 
C16 C15 H15 120.2 . . ? 
C14 C15 H15 120.2 . . ? 
C15 C16 C11 121.6(3) . . ? 
C15 C16 H16 119.2 . . ? 
C11 C16 H16 119.2 . . ? 
N1 C17 C3 118.2(3) . . ? 
N1 C17 S2 126.4(2) . . ? 
C3 C17 S2 115.4(2) . . ? 
N1 C18 C20 112.4(3) . . ? 
N1 C18 C19 110.4(3) . . ? 
C20 C18 C19 112.7(3) . . ? 
N1 C18 H18 107.0 . . ? 
C20 C18 H18 107.0 . . ? 
C19 C18 H18 107.0 . . ? 
C18 C19 H19 109.5 . . ? 
C18 C19 H19A 109.5 . . ? 
H19 C19 H19A 109.5 . . ? 
C18 C19 H19B 109.5 . . ? 
H19 C19 H19B 109.5 . . ? 
H19A C19 H19B 109.5 . . ? 
C18 C20 H20 109.5 . . ? 
C18 C20 H20A 109.5 . . ? 
H20 C20 H20A 109.5 . . ? 
C18 C20 H20B 109.5 . . ? 
H20 C20 H20B 109.5 . . ? 
H20A C20 H20B 109.5 . . ? 
N1 C21 C22 113.7(2) . . ? 
N1 C21 C23 112.0(3) . . ? 
C22 C21 C23 112.7(3) . . ? 
N1 C21 H21 105.9 . . ? 
C22 C21 H21 105.9 . . ? 
C23 C21 H21 105.9 . . ? 
C21 C22 H22 109.5 . . ? 
C21 C22 H22A 109.5 . . ? 
H22 C22 H22A 109.5 . . ? 
C21 C22 H22B 109.5 . . ? 
H22 C22 H22B 109.5 . . ? 
H22A C22 H22B 109.5 . . ? 
C21 C23 H23 109.5 . . ? 
C21 C23 H23A 109.5 . . ? 
H23 C23 H23A 109.5 . . ? 
C21 C23 H23B 109.5 . . ? 
H23 C23 H23B 109.5 . . ? 
H23A C23 H23B 109.5 . . ? 
 
loop_ 
 _geom_torsion_atom_site_label_1 
 _geom_torsion_atom_site_label_2 
 _geom_torsion_atom_site_label_3 
 _geom_torsion_atom_site_label_4 
 _geom_torsion 
 _geom_torsion_site_symmetry_1 
 _geom_torsion_site_symmetry_2 
 _geom_torsion_site_symmetry_3 
 _geom_torsion_site_symmetry_4 
 _geom_torsion_publ_flag 
C4 S1 C1 C2 2.1(2) . . . . ? 
C4 S1 C1 C5 -176.0(2) . . . . ? 
C5 C1 C2 C3 175.4(3) . . . . ? 
S1 C1 C2 C3 -2.6(3) . . . . ? 
C1 C2 C3 C4 1.8(4) . . . . ? 
C1 C2 C3 C17 -179.0(3) . . . . ? 
C2 C3 C4 C11 -177.4(3) . . . . ? 
C17 C3 C4 C11 3.4(5) . . . . ? 
C2 C3 C4 S1 -0.1(3) . . . . ? 
C17 C3 C4 S1 -179.3(2) . . . . ? 
C1 S1 C4 C3 -1.1(2) . . . . ? 
C1 S1 C4 C11 176.5(2) . . . . ? 
C2 C1 C5 C6 -149.5(3) . . . . ? 
S1 C1 C5 C6 28.3(4) . . . . ? 
C2 C1 C5 C10 27.7(5) . . . . ? 
S1 C1 C5 C10 -154.6(3) . . . . ? 
C10 C5 C6 C7 -1.4(5) . . . . ? 
C1 C5 C6 C7 175.8(3) . . . . ? 
C5 C6 C7 C8 0.8(5) . . . . ? 
C6 C7 C8 C9 -0.1(5) . . . . ? 
C7 C8 C9 C10 -0.1(5) . . . . ? 
C8 C9 C10 C5 -0.5(5) . . . . ? 
C6 C5 C10 C9 1.3(5) . . . . ? 
C1 C5 C10 C9 -176.0(3) . . . . ? 
C3 C4 C11 C16 143.4(3) . . . . ? 
S1 C4 C11 C16 -33.7(4) . . . . ? 
C3 C4 C11 C12 -36.6(5) . . . . ? 
S1 C4 C11 C12 146.3(3) . . . . ? 
C16 C11 C12 C13 -1.5(5) . . . . ? 
C4 C11 C12 C13 178.6(3) . . . . ? 
C11 C12 C13 C14 0.7(5) . . . . ? 
C12 C13 C14 C15 0.7(6) . . . . ? 
C13 C14 C15 C16 -1.2(5) . . . . ? 
C14 C15 C16 C11 0.4(5) . . . . ? 
C12 C11 C16 C15 0.9(5) . . . . ? 
C4 C11 C16 C15 -179.1(3) . . . . ? 
C18 N1 C17 C3 -3.0(4) . . . . ? 
C21 N1 C17 C3 -179.4(3) . . . . ? 
C18 N1 C17 S2 175.8(2) . . . . ? 
C21 N1 C17 S2 -0.6(4) . . . . ? 
C4 C3 C17 N1 -75.6(4) . . . . ? 
C2 C3 C17 N1 105.3(3) . . . . ? 
C4 C3 C17 S2 105.5(3) . . . . ? 
C2 C3 C17 S2 -73.7(3) . . . . ? 
C17 N1 C18 C20 122.2(3) . . . . ? 
C21 N1 C18 C20 -61.1(4) . . . . ? 
C17 N1 C18 C19 -111.0(3) . . . . ? 
C21 N1 C18 C19 65.7(3) . . . . ? 
C17 N1 C21 C22 63.0(4) . . . . ? 
C18 N1 C21 C22 -113.7(3) . . . . ? 
C17 N1 C21 C23 -66.2(4) . . . . ? 
C18 N1 C21 C23 117.1(3) . . . . ? 
 
_diffrn_measured_fraction_theta_max    0.999 
_diffrn_reflns_theta_full              27.49 
_diffrn_measured_fraction_theta_full   0.999 
_refine_diff_density_max    0.295 
_refine_diff_density_min   -0.339 
_refine_diff_density_rms    0.067 
